# Supplementary material
Source: PubMed Central journal article supplement (PMC3006067)

a: free mycolic acid (*R. equi*)

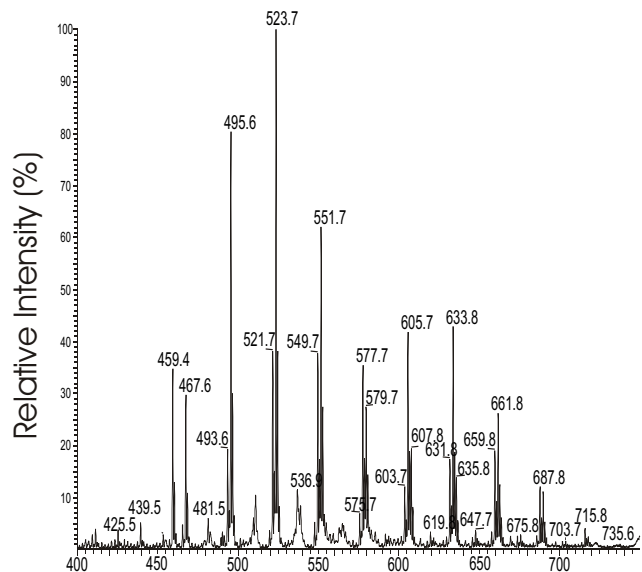

c: free mycolic acid (*R. rhodnii*)

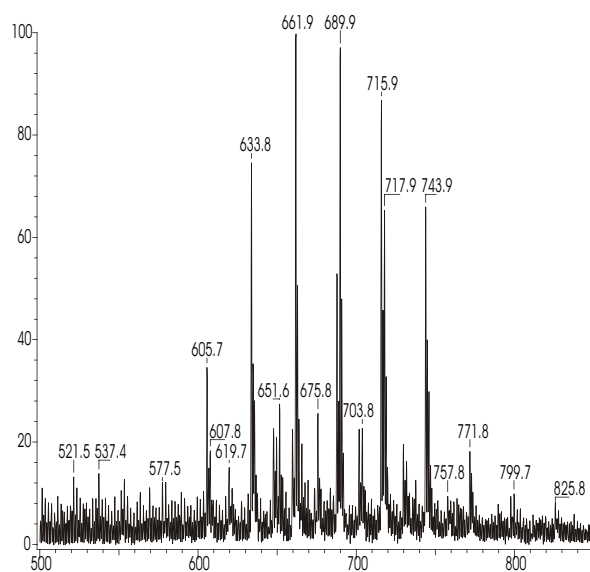

e: free mycolic acid (*R. terrae*)

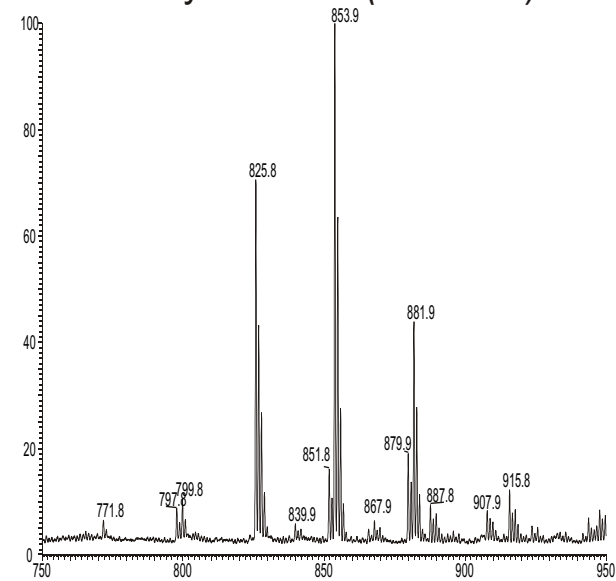

b: bound mycolic acid (*R. equi*)

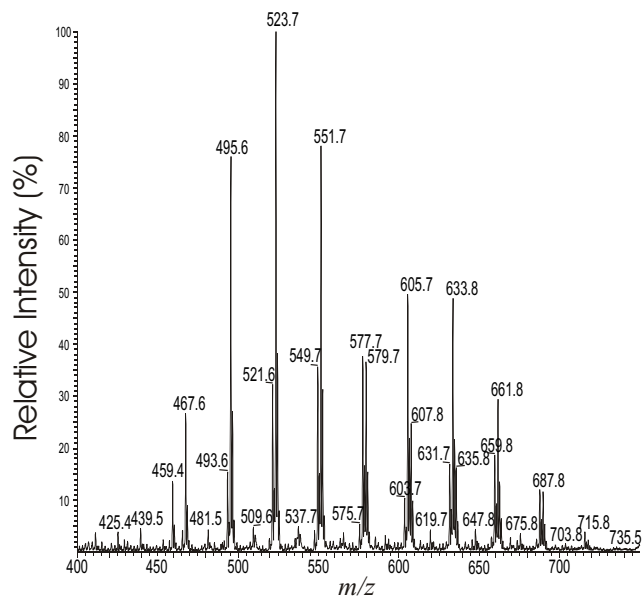

d: bound mycolic acid (*R. rhodnii*)

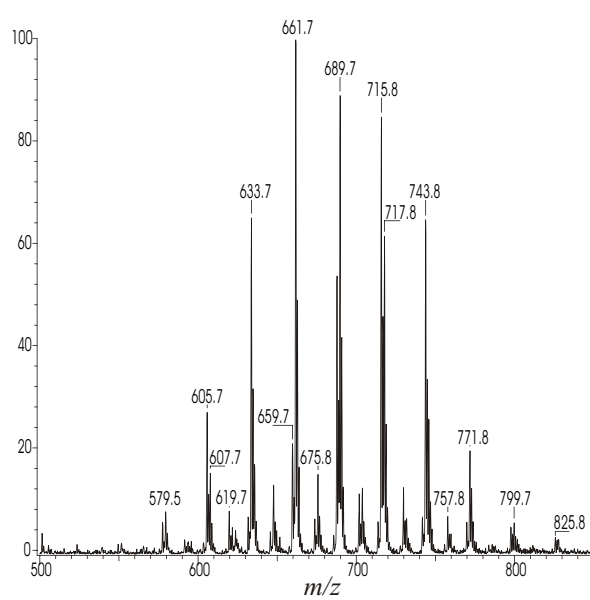

f: bound mycolic acid (*R. terrae*)

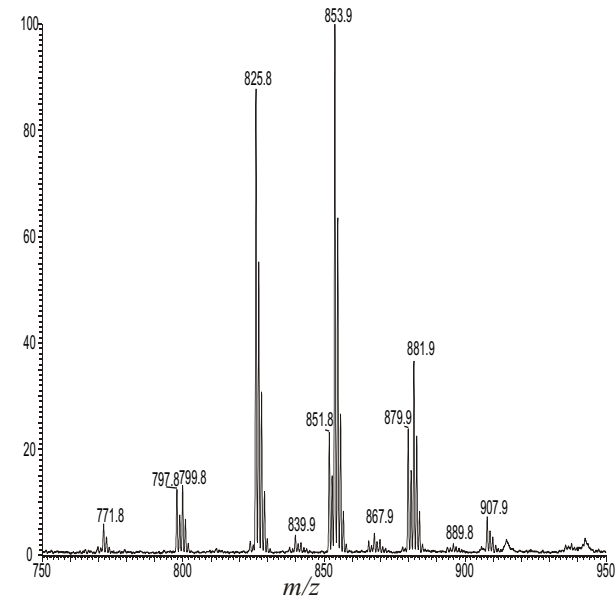

Supplement: NIHMS245930-supplement-01.pdf [file NIHMS245930-supplement-01.pdf]
